# Supplementary material for: The Nedd8 Non-covalent Binding Region in the Smurf HECT Domain is Critical to its Ubiquitn Ligase Function
Source: PubMed Central journal article supplement (PMC5294409; doi:10.1038/srep41364), 2017-02-07
Supplement: srep41364-s1.pdf [file srep41364-s1.pdf]

## **Supplementary Information**

### **The Nedd8 Non-covalent Binding Region in the Smurf HECT Domain is Critical to its Ubiquitin Ligase Function**

**Shan He<sup>1</sup>, Yu Cao<sup>1,2</sup>, Ping Xie<sup>1</sup>, Guanglong Dong<sup>3\*</sup>, Lingqiang Zhang<sup>1\*</sup>**

1 State Key Laboratory of Proteomics, Beijing Proteome Research Center, Beijing Institute of Radiation Medicine, Collaborative Innovation Center for Cancer Medicine, Beijing 100850, China.

2 Georgia Cancer Center, Augusta University, Augusta GA, USA.

3 Department of General Surgery, Chinese People's Liberation Army General Hospital, Beijing 100853, China.

\*Co-corresponding authors: Lingqiang Zhang, Email: zhanglq@nic.bmi.ac.cn or Guanglong Dong, Email: gldong301@163.com

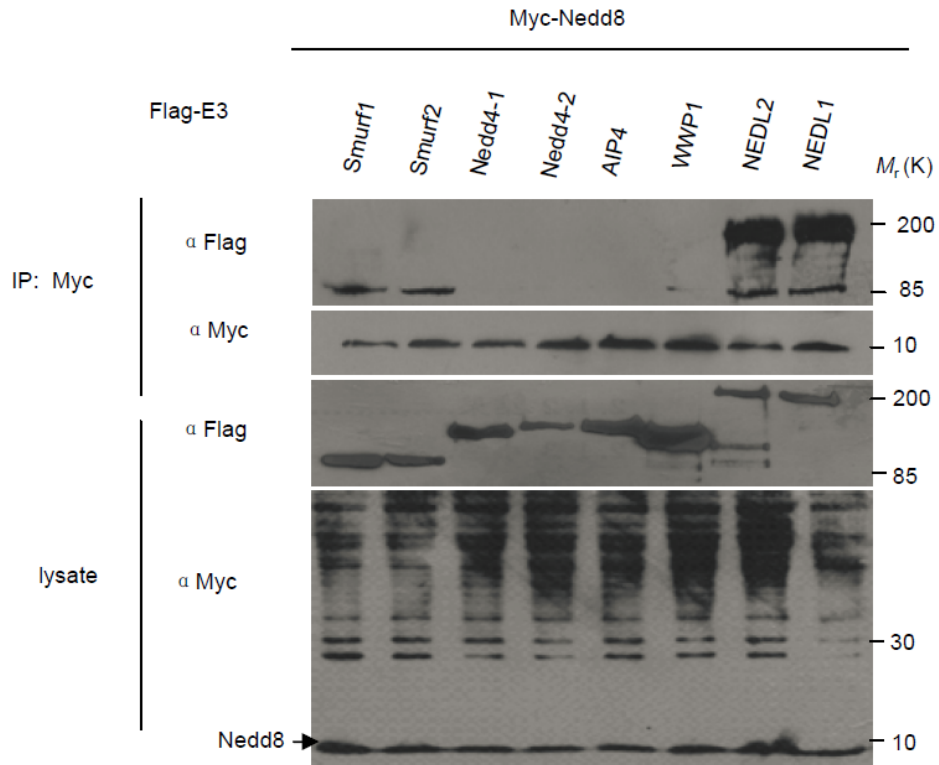

Figure S1. The interaction of Nedd4 family members and Nedd8 *in vivo*.

Interaction analysis of Nedd4 family E3s with Nedd8 by Co-IP assays in HEK293T cells.
